# Supplementary material for: Comparative genomics analysis of completely sequenced microbial genomes reveals the ubiquity of N-linked glycosylation in prokaryotes
Source: Royal Society of Chemistry journal article supplement (doi:10.1039/c0mb00259c), 2011-03-08
Supplement: c0mb00259c.pdf [file c0mb00259c.pdf]

**Table S1** Eubacteria and archaea used for the construction of phylogenetic tree along with their ribosomal database project (RDP) ids.

| <b>Eubacteria (452 organisms)</b>                                          | <b>RDP id</b> |
|----------------------------------------------------------------------------|---------------|
| <i>Acaryochloris marina</i> MBIC11017 AB058298                             | S000268532    |
| <i>Acholeplasma laidlawii</i> T PG8 ATCC 23206 U14905                      | S000437171    |
| <i>Acidiphilium cryptum</i> T ATCC 33463 D30773                            | S000413728    |
| <i>Acidithiobacillus ferrooxidans</i> DSM9465 NFe4 Y11595                  | S000017846    |
| <i>Acidovorax citrulli</i> T ATCC 29625 AF078761                           | S000428517    |
| <i>Acidovorax</i> sp 98-63833 AY258065                                     | S000404806    |
| <i>Acinetobacter baumannii</i> T DSM 30007 X81660                          | S000012980    |
| <i>Actinobacillus succinogenes</i> T 130Z AF024525                         | S000427736    |
| <i>Aeromonas hydrophila</i> subsp <i>hydrophila</i> T ATCC 7966T X74677    | S000016358    |
| <i>Aeromonas salmonicida</i> subsp <i>salmonicida</i> T ATCC 27013T X74680 | S000000394    |
| <i>Akkermansia muciniphila</i> Muc AY271254                                | S000460661    |
| <i>Alcanivorax borkumensis</i> T Sk2 Y12579                                | S000018396    |
| <i>Aliivibrio fischeri</i> T ATCC774T X74702                               | S000006317    |
| <i>Aliivibrio salmonicida</i> T NCMB 2262 X70643                           | S000007404    |
| <i>Alkalilimnicola ehrlichii</i> MLHE-1 AF406554                           | S000393265    |
| <i>Alkaliphilus metalliredigens</i> QYMF CP000724                          | S000891554    |
| <i>Alkaliphilus oremlandii</i> OhILAs CP000853                             | S000942093    |
| <i>Alteromonas macleodii</i> T DSM 6062 Y18228                             | S000014590    |
| <i>Anabaena variabilis</i> IAM M-204 AB074502                              | S000112413    |
| <i>Anaerocellum thermophilum</i> Z-1203 L09180                             | S000414358    |
| <i>Anaeromyxobacter dehalogenans</i> T 2CP-1 ATCC BAA-258 AF382396         | S000392790    |
| <i>Anaplasma marginale</i> T AF311303                                      | S000391339    |
| <i>Anaplasma phagocytophilum</i> T CAMAWI AF172167                         | S000388561    |
| <i>Anoxybacillus flavithermus</i> T DSM 2641 Z26932                        | S000001145    |
| <i>Aquifex aeolicus</i> VF5 AJ309733                                       | S000263494    |
| <i>Arcobacter butzleri</i> ATCC 49616 AY621116                             | S000332554    |
| <i>Aromatoleum aromaticum</i> EbN1 CR555306                                | S000528908    |
| <i>Arthrobacter aurescens</i> T DSM20116 X83405                            | S000002956    |
| <i>Arthrobacter chlorophenolicus</i> T A-6 AF102267                        | S000428904    |
| <i>Aster yellows phytoplasma</i> A 99UW111 AF268408                        | S000000688    |
| <i>Azoarcus</i> sp LU1 AJ007007                                            | S000002684    |
| <i>Azorhizobium caulinodans</i> T LMG 6465 X67221                          | S000364327    |
| <i>Bacillus amyloliquefaciens</i> T ATCC 23350 X60605                      | S000129463    |
| <i>Bacillus anthracis</i> me-12 EU652063                                   | S001098776    |
| <i>Bacillus clausii</i> T DSM 8716 X76440                                  | S000003470    |
| <i>Bacillus cytotoxicus</i> CVUAS 2979 08L 12456 004 1 EU888300            | S001240936    |
| <i>Bacillus halodurans</i> T DSM 497T AJ302709                             | S000010351    |
| <i>Bacillus licheniformis</i> T DSM 13 X68416                              | S000006574    |
| <i>Bacillus pumilus</i> T DSMZ27 AY456263                                  | S000378387    |
| <i>Bacillus subtilis</i> subsp <i>subtilis</i> T DSM10 AJ276351            | S000003473    |
| <i>Bacillus thuringiensis</i> T ATCC10792 AF290545                         | S000021267    |
| <i>Bacillus weihenstephanensis</i> T DSM11821 AB021199                     | S000016288    |
| <i>Bacteroides fragilis</i> T ATCC 25285T 1 X83935                         | S000015672    |
| <i>Bacteroides thetaiotaomicron</i> T L16489                               | S000414472    |
| <i>Bacteroides vulgatus</i> T M58762                                       | S000436356    |

|                                                                                                                                                   |            |
|---------------------------------------------------------------------------------------------------------------------------------------------------|------------|
| <i>Bartonella bacilliformis</i> T ATCC 35685 pBart 84-1 Z11683                                                                                    | S000000975 |
| <i>Bartonella henselae</i> M73229                                                                                                                 | S000002769 |
| <i>Bartonella quintana</i> Fuller M73228                                                                                                          | S000015400 |
| <i>Bartonella tribocorum</i> T IBS 506 AJ003070                                                                                                   | S000012687 |
| <i>Baumannia cicadellinicola</i> AF465795                                                                                                         | S000394582 |
| <i>Bdellovibrio bacteriovorus</i> T HD 100 DSM 50701 AJ292759                                                                                     | S000130039 |
| <i>Beijerinckia indica</i> subsp <i>indica</i> T M59060                                                                                           | S000436435 |
| <i>Bifidobacterium adolescentis</i> T M58729                                                                                                      | S000436340 |
| <i>Bifidobacterium animalis</i> subsp <i>animalis</i> T ATCC 25527 X70971                                                                         | S000006180 |
| <i>Bifidobacterium longum</i> biovar <i>Longum</i> T M58739                                                                                       | S000436350 |
| <i>Bordetella avium</i> T ATCC 35086 U04947                                                                                                       | S000437034 |
| <i>Bordetella bronchiseptica</i> T ATCC 19395 U04948                                                                                              | S000437035 |
| <i>Bordetella parapertussis</i> T ATCC 15311 U04949                                                                                               | S000437036 |
| <i>Bordetella pertussis</i> T ATCC 9797 U04950                                                                                                    | S000437037 |
| <i>Bordetella petrii</i> T DSM 12804 Se-1111R AJ249861                                                                                            | S000009593 |
| <i>Borrelia burgdorferi</i> T M59293                                                                                                              | S000436531 |
| <i>Borrelia duttonii</i> VS4 AB113315                                                                                                             | S000364601 |
| <i>Borrelia garinii</i> isolate Fis01 AJ009751                                                                                                    | S000000042 |
| <i>Borrelia hermsii</i> SB82 AF228031                                                                                                             | S000001129 |
| <i>Borrelia recurrentis</i> A4 AF107356                                                                                                           | S000429012 |
| <i>Borrelia turicatae</i> M2007 U42299                                                                                                            | S000437624 |
| <i>Brachyspira hyodysenteriae</i> T B78 M57743                                                                                                    | S000436335 |
| <i>Bradyrhizobium japonicum</i> T USDA 6 3I1b6 ATCC10324 SEMIA 5052<br>RCR 3425 ACCC 15032 original isolate received by USDA from Dr K Aso U69638 | S000438365 |
| <i>Bradyrhizobium</i> sp BTA-1 T AJ558025                                                                                                         | S000270387 |
| <i>Brucella melitensis</i> biovar <i>Abortus</i> 2002013043 AY513560                                                                              | S000369352 |
| <i>Brucella melitensis</i> biovar <i>Canis</i> 2000032907 AY513510                                                                                | S000369302 |
| <i>Brucella melitensis</i> biovar <i>Ovis</i> 2002013049 AY513525                                                                                 | S000369317 |
| <i>Brucella melitensis</i> biovar <i>Suis</i> 1997000956 AY513553                                                                                 | S000369345 |
| <i>Brucella melitensis</i> T L26166                                                                                                               | S000414547 |
| <i>Buchnera aphidicola</i> T M63246                                                                                                               | S000436613 |
| <i>Burkholderia ambifaria</i> MVPC14 AY028444                                                                                                     | S000434597 |
| <i>Burkholderia cenocepacia</i> T LMG 16656 AF148556                                                                                              | S000388165 |
| <i>Burkholderia multivorans</i> T LMG 13010T Y18703                                                                                               | S000017474 |
| <i>Burkholderia phymatum</i> T STM815 AJ302312                                                                                                    | S000130044 |
| <i>Burkholderia phytofirmans</i> T PsJN AY497470                                                                                                  | S000540546 |
| <i>Burkholderia pseudomallei</i> T ATCC 23343 DQ108392                                                                                            | S000711758 |
| <i>Burkholderia</i> sp CHNCT10 EF471225                                                                                                           | S000843456 |
| <i>Burkholderia thailandensis</i> T E264 U91838                                                                                                   | S000438836 |
| <i>Burkholderia vietnamiensis</i> T AMMD AF043302                                                                                                 | S000428013 |
| <i>Burkholderia xenovorans</i> T LB400 U86373                                                                                                     | S000469110 |
| <i>Caldanaerobacter subterraneus</i> subsp <i>tengcongensis</i> T MB4 AF209708                                                                    | S000389130 |
| <i>Caldicellulosiruptor saccharolyticus</i> Tok7B1 AF130258                                                                                       | S000004674 |
| <i>Campylobacter concisus</i> T L04322                                                                                                            | S000414274 |
| <i>Campylobacter fetus</i> subsp <i>fetus</i> T L04314                                                                                            | S000414266 |
| <i>Campylobacter hominis</i> T NCTC 13146 CH001A AJ251584                                                                                         | S000004853 |
| <i>Campylobacter jejuni</i> subsp <i>jejuni</i> T L14630                                                                                          | S000414431 |
| <i>Campylobacter lari</i> subsp <i>lari</i> T CCUG 23947 L04316                                                                                   | S000414268 |
| <i>Candidatus Amoebophilus asiaticus</i> AF366581                                                                                                 | S000499364 |
| <i>Candidatus Azobacteroides pseudotrichonymphae</i> genomovar CFP2 AP010656                                                                      | S001198291 |

|                                                                                               |            |
|-----------------------------------------------------------------------------------------------|------------|
| <i>Candidatus Blochmannia herculeanus</i> USA AJ250715                                        | S000018001 |
| <i>Candidatus Carsonella ruddii</i> AF211130                                                  | S000389158 |
| <i>Candidatus Desulforudis audaxviator</i> MP104C CP000860                                    | S001014380 |
| <i>Candidatus Koribacter versatilis</i> Ellin345 CP000360                                     | S000690634 |
| <i>Candidatus Pelagibacter ubique</i> HTCC1062 AF510191                                       | S000430652 |
| <i>Candidatus Phytoplasma ulmi</i> T EY1 AY197655                                             | S000356576 |
| <i>Candidatus Protochlamydia amoebophila</i> UWE25 BX908798                                   | S000528638 |
| <i>Candidatus Ruthia magnifica</i> str Cm Calyptogena magnifica CP000488                      | S000768672 |
| <i>Candidatus Sulcia muelleri</i> Cerc3 DQ066629                                              | S000624822 |
| <i>Candidatus Vesicomysocius okutanii</i> HA AP009247                                         | S000858629 |
| <i>Caulobacter</i> sp MCS23 AJ227807                                                          | S000112628 |
| <i>Caulobacter vibrioides</i> T ATCC 15252T AJ227756                                          | S000112511 |
| <i>Cellvibrio japonicus</i> T NCIMB 10462 NCDO 2697 AF452103                                  | S000394396 |
| <i>Chlamydia muridarum</i> T MoPnWiess-Nigg D85718                                            | S000435880 |
| <i>Chlamydia trachomatis</i> T HAR-13 D89067                                                  | S000414224 |
| <i>Chlamydia abortus</i> T OvB577 ATCC VR656 D85709                                           | S000414096 |
| <i>Chlamydia caviae</i> T GpIc ATCC VR813 D85708                                              | S000435878 |
| <i>Chlamydia felis</i> T FePn-1 ATCC VR120 D85701                                             | S000435877 |
| <i>Chlamydia pneumoniae</i> T Z49873                                                          | S000017485 |
| <i>Chlorobaculum tepidum</i> T M58468                                                         | S000622337 |
| <i>Chlorobium chlorochromatii</i> CaD AJ578461                                                | S000366609 |
| <i>Chlorobium luteolum</i> DSM 273 CP000096                                                   | S000610891 |
| <i>Chlorobium phaeobacteroides</i> T 2430 Y08104                                              | S000137974 |
| <i>Chlorobium phaeovibrioides</i> T 2631 Y08105                                               | S000136880 |
| <i>Chloroflexus aggregans</i> T MD-66 D32255                                                  | S000482831 |
| <i>Chloroflexus aurantiacus</i> T J-10-fl D38365                                              | S000482832 |
| <i>Chloroflexus</i> sp 396-1 AJ308498                                                         | S000020381 |
| <i>Chloroherpeton thalassium</i> AF170103                                                     | S000011521 |
| <i>Chromobacterium violaceum</i> T M22510                                                     | S000436064 |
| <i>Citrobacter koseri</i> T CDC 3613-63 AF025372                                              | S000427778 |
| <i>Clavibacter michiganensis</i> subsp tessellarius T ATCC 33566 U96181                       | S000438891 |
| <i>Clostridium beijerinckii</i> T DSM791 X68179                                               | S000014607 |
| <i>Clostridium botulinum</i> A T L37585                                                       | S000414699 |
| <i>Clostridium cellulolyticum</i> T ATCC 35319 X71847                                         | S000007743 |
| <i>Clostridium difficile</i> T DSM 11209 X73450                                               | S000260455 |
| <i>Clostridium novyi</i> T L37594                                                             | S000414708 |
| <i>Clostridium perfringens</i> T M59103                                                       | S000436468 |
| <i>Clostridium phytofermentans</i> ISDg ATCC 700394 AF020431                                  | S000387174 |
| <i>Clostridium tetani</i> T NCTC 279 X74770                                                   | S000260778 |
| <i>Clostridium thermocellum</i> T L09173                                                      | S000414351 |
| <i>Colwellia psychrerythraea</i> T ATCC27364 ACAM 550T AF001375                               | S000386862 |
| <i>Coprothermobacter proteolyticus</i> T ATCC 35245 X69335                                    | S000127397 |
| <i>Corynebacterium aurimucosum</i> T type strain IMMIB D-1488 DSM 44532 NRRL B-24143 AJ309207 | S000366396 |
| <i>Corynebacterium diphtheriae</i> T CCUG 2708 X81911                                         | S000002705 |
| <i>Corynebacterium efficiens</i> T YS-314 AB055963                                            | S000383775 |
| <i>Corynebacterium glutamicum</i> T type strain DSM20300 X80629                               | S000364384 |
| <i>Corynebacterium jeikeium</i> T ATCC 43734 U87823                                           | S000005844 |
| <i>Corynebacterium urealyticum</i> T ATCC 43042T X81913                                       | S000003489 |
| <i>Coxiella burnetii</i> S4 Y11501                                                            | S000009213 |
| <i>Cronobacter sakazakii</i> T JCM1233 AB004746                                               | S000381741 |

|                                                                                            |            |
|--------------------------------------------------------------------------------------------|------------|
| <i>Cupriavidus metallidurans</i> CH34 CP000353                                             | S000653107 |
| <i>Cupriavidus necator</i> H16 AM260479                                                    | S000730503 |
| <i>Cupriavidus taiwanensis</i> T LMG 19424 AF300324                                        | S001171508 |
| <i>Cytophaga hutchinsonii</i> T M58768                                                     | S000436362 |
| <i>Dechloromonas aromatica</i> RCB AY032610                                                | S000434660 |
| <i>Dehalococcoides ethenogenes</i> strain 195 AF004928                                     | S000386912 |
| <i>Dehalococcoides</i> sp BHI80-52 AJ431247                                                | S000128545 |
| <i>Deinococcus deserti</i> T VCD115 AY876378                                               | S000481081 |
| <i>Deinococcus geothermalis</i> T AG-3aT Y13038                                            | S000003901 |
| <i>Deinococcus radiodurans</i> T DSM 20539T Y11332                                         | S000009620 |
| <i>Delftia acidovorans</i> T IAM 12409T AB021417                                           | S000010699 |
| <i>Desulfatibacillum alkenivorans</i> T PF2803 AY493562                                    | S000420138 |
| <i>Desulfobacterium hafniense</i> T DCB-2 X94975                                           | S000001583 |
| <i>Desulfococcus oleovorans</i> Hxd3 CP000859                                              | S000965220 |
| <i>Desulfotalea psychrophila</i> T LSv54 AF099062                                          | S000428875 |
| <i>Desulfotomaculum reducens</i> MI-1 U95951                                               | S000438890 |
| <i>Desulfovibrio desulfuricans</i> subsp <i>desulfuricans</i> T Essex 6 ATCC29577 AF192153 | S000006150 |
| <i>Diaphorobacter</i> sp PCA039 AY559251                                                   | S000413172 |
| <i>Dictyoglomus thermophilum</i> T DSM 3960 T X69194                                       | S000010022 |
| <i>Dictyoglomus turgidum</i> DSM 6724 CP001251                                             | S001239450 |
| <i>Dinoroseobacter shibae</i> T type strain DFL 12 AJ534211                                | S000543935 |
| <i>Ehrlichia canis</i> T 611 U26740                                                        | S000437402 |
| <i>Ehrlichia chaffeensis</i> T 91HE17 U23503                                               | S000437299 |
| <i>Ehrlichia ruminantium</i> T Ball3 U03777                                                | S000437009 |
| <i>Elusimicrobium minutum</i> Pei191 CP001055                                              | S001094702 |
| <i>Ensifer medicae</i> T2 EU928875                                                         | S001169481 |
| <i>Ensifer meliloti</i> T LMG 6133 X67222                                                  | S000364328 |
| <i>Erwinia tasmaniensis</i> type strain Et199 AM055716                                     | S000629150 |
| <i>Erythrobacter litoralis</i> T DSM8509T AB013354                                         | S000004181 |
| <i>Escherichia coli</i> T ATCC 11775T X80725                                               | S000004313 |
| <i>Escherichia fergusonii</i> T ATCC 35469 AF530475                                        | S000139289 |
| <i>Fervidobacterium nodosum</i> T M59177                                                   | S000007611 |
| <i>Fingoldia magna</i> T ATCC 15794 GIFU 7881 D14149                                       | S000995192 |
| <i>Flavobacterium johnsoniae</i> T M59051                                                  | S000436431 |
| <i>Francisella novicida</i> RB401 EU365864                                                 | S001240435 |
| <i>Francisella philomiragia</i> T type strain ATCC 25015 AJ698862                          | S000352704 |
| <i>Francisella tularensis</i> T lvs ATCC 6223 FSC 155 Z21931                               | S000128268 |
| <i>Fusobacterium nucleatum</i> subsp <i>nucleatum</i> ATCC 25586T AJ133496                 | S000005859 |
| <i>Gemmatimonas aurantiaca</i> T T-27 AB072735                                             | S000251887 |
| <i>Geobacillus kaustophilus</i> T NCIMB 8547 X60618                                        | S000128486 |
| <i>Geobacillus thermodenitrificans</i> T DSM 465 Z26928                                    | S000004284 |
| <i>Geobacter bemidjiensis</i> T Bem AY187307                                               | S000571800 |
| <i>Geobacter lovleyi</i> SZ AY914177                                                       | S000490893 |
| <i>Geobacter metallireducens</i> T GS-15 L07834                                            | S000414324 |
| <i>Geobacter</i> sp CdA-2 Y19190                                                           | S000005862 |
| <i>Geobacter sulfurreducens</i> T PCA U13928                                               | S000437158 |
| <i>Geobacter uraniireducens</i> Rf4 CP000698                                               | S000858727 |
| <i>Gloeobacter violaceus</i> PCC 7421 AF132790                                             | S000387822 |
| <i>Gluconacetobacter diazotrophicus</i> T ATCC49037 LMG7603 X75618                         | S000011481 |
| <i>Gluconobacter oxydans</i> T DSM 3503 X73820                                             | S000014972 |

|                                                                       |            |
|-----------------------------------------------------------------------|------------|
| <i>Gramella forsetii</i> KT0803 CU207366                              | S000750131 |
| <i>Granulibacter bethesdensis</i> CGDNIH1 AY788950                    | S000610642 |
| <i>Haemophilus ducreyi</i> T M75078                                   | S000436707 |
| <i>Haemophilus influenzae</i> T M35019                                | S000436254 |
| <i>Haemophilus parasuis</i> T M75065                                  | S000436694 |
| <i>Haemophilus somnus</i> 129PT CP000436                              | S000730530 |
| <i>Hahella chejuensis</i> T KCTC 2396 AF195410                        | S000388921 |
| <i>Halothermothrix orenii</i> T L22016                                | S000414511 |
| <i>Helicobacter acinonychis</i> T Eaton 90-119-3 M88148               | S000363188 |
| <i>Helicobacter hepaticus</i> T Hh-2 U07574                           | S000334525 |
| <i>Helicobacter pylori</i> T 11637 NCTC Type strain Z25741            | S000014640 |
| <i>Heliobacterium modesticaldum</i> T Ice1 U14559                     | S000437162 |
| <i>Hermiimonas arsenicoxydans</i> ULPAs1 AY728038                     | S000453533 |
| <i>Hydrogenobaculum</i> sp NOR3L3B AJ320225                           | S000104648 |
| <i>Hyphomonas neptunium</i> T LE-670 AF082798                         | S000428575 |
| <i>Idiomarina loihiensis</i> T L2-TR AF288370                         | S000340900 |
| <i>Kineococcus radiotolerans</i> T SRS30216 AF247813                  | S000390051 |
| <i>Klebsiella pneumoniae</i> T ATCC13883T Y17656                      | S000001991 |
| <i>Kocuria rhizophila</i> T TA68 DSM 11926 type strain Y16264         | S000008149 |
| <i>Lactobacillus acidophilus</i> NCDO 1748 T X61138                   | S000015716 |
| <i>Lactobacillus brevis</i> NCDO 1749 T X61134                        | S000002726 |
| <i>Lactobacillus casei</i> NCDO 161 T X61135                          | S000014980 |
| <i>Lactobacillus fermentum</i> NCDO 1750 T X61142                     | S000012733 |
| <i>Lactobacillus gasserii</i> NCDO 2233 T X61137                      | S000010822 |
| <i>Lactobacillus helveticus</i> NCDO 2712 T X61141                    | S000008891 |
| <i>Lactobacillus johnsonii</i> T ATCC 33200 T AJ002515                | S000006242 |
| <i>Lactobacillus plantarum</i> T JCM 1149 D79210                      | S000413946 |
| <i>Lactobacillus reuteri</i> T L23507                                 | S000414529 |
| <i>Lactobacillus sakei</i> subsp <i>carneus</i> T CCUG 34545 AY204889 | S000417782 |
| <i>Lactobacillus salivarius</i> T ATCC 11741 AF089108                 | S001168699 |
| <i>Lactococcus lactis</i> subsp <i>cremoris</i> T M58836              | S000436427 |
| <i>Laribacter hongkongensis</i> T HKU1 AF389085                       | S000392882 |
| <i>Lawsonia intracellularis</i> T NCTC 12657 U30147                   | S000437459 |
| <i>Legionella pneumophila</i> T M59157                                | S000436520 |
| <i>Leifsonia xyli</i> subsp <i>cynodontis</i> T JCM 9733 AB016985     | S000427553 |
| <i>Leptospira biflexa</i> T patoc Patoc 1 Z12821                      | S000127934 |
| <i>Leptospira borgpetersenii</i> T JAVANICA VELDRAT BATAVIA 46 Z21630 | S000006243 |
| <i>Leptospira interrogans</i> T icterohaemorrhagiae RGA Z12817        | S000126674 |
| <i>Leptothrix cholodnii</i> CCM 1827 X97070                           | S000009647 |
| <i>Leuconostoc citreum</i> NCFB 2787 X53963                           | S000134293 |
| <i>Leuconostoc mesenteroides</i> subsp <i>cremoris</i> T M23034       | S000436076 |
| <i>Listeria innocua</i> T ATCC33090 X98527                            | S000005872 |
| <i>Listeria monocytogenes</i> T NCTC10357 X56153                      | S000131236 |
| <i>Listeria welshimeri</i> T ATCC35897 X98532                         | S000013094 |
| <i>Lysinibacillus sphaericus</i> T L14010                             | S000414413 |
| <i>Macrococcus caseolyticus</i> T ATCC 13548 MAFF 911387 D83359       | S000413960 |
| <i>Magnetococcus</i> sp MC-1 CP000471                                 | S000750109 |
| <i>Mannheimia succiniciproducens</i> 55E AY029193                     | S000434606 |
| <i>Maricaulis maris</i> T ATCC 15268 T AJ007807                       | S000013061 |
| <i>Marinobacter hydrocarbonoclasticus</i> VT8 CP000514                | S000775655 |

|                                                                                         |            |
|-----------------------------------------------------------------------------------------|------------|
| <i>Marinomonas</i> sp CK13 T AJ833000                                                   | S000417331 |
| <i>Mesoplasma</i> florum T L1 ATCC 33453 AF300327                                       | S000390947 |
| <i>Mesorhizobium</i> loti T ATCC 33669 D14514                                           | S000380772 |
| <i>Mesorhizobium</i> sp BNC1 CP000390                                                   | S000711611 |
| <i>Methylacidiphilum</i> inferorum V4 CP000975                                          | S001044267 |
| <i>Methylibium</i> petroleiphilum PM1 T AF176594                                        | S000388643 |
| <i>Methylobacillus</i> flagellatus T M95651                                             | S000436929 |
| <i>Methylobacterium</i> extorquens CM4 T AF198624                                       | S000388994 |
| <i>Methylobacterium</i> extorquens PA1 CP000908                                         | S000979499 |
| <i>Methylobacterium</i> nodulans T ORS 2060 AF220763                                    | S000483600 |
| <i>Methylobacterium</i> populi T BJ001 ATCC BAA-705 NCIMB 13946 AY251818                | S000368128 |
| <i>Methylobacterium</i> radiotolerans T JCM 2831 D32227                                 | S000469013 |
| <i>Methylocella</i> silvestris T BL2 AJ491847                                           | S000146627 |
| <i>Methylococcus</i> capsulatus T sspACM 1292 ATCC 19069 NCIMB 11853 strTexas X72770    | S000002740 |
| <i>Microcystis</i> aeruginosa T NC7 AB035549                                            | S000015833 |
| <i>Mycobacterium</i> abscessus T type strain DSM 44196 AJ536038                         | S000263393 |
| <i>Mycobacterium</i> avium subsp paratuberculosis T ATCC 19698 X52934                   | S000006259 |
| <i>Mycobacterium</i> gilvum T ATCC 43909 X55599                                         | S000128634 |
| <i>Mycobacterium</i> leprae T Leprosy Tissue Bank Research Institute Borstel FRG X55587 | S000129729 |
| <i>Mycobacterium</i> marinum T ATCC 927 AF456240                                        | S000091563 |
| <i>Mycobacterium</i> smegmatis T ATCC 19420 AJ131761                                    | S000112631 |
| <i>Mycobacterium</i> sp C48 AB302334                                                    | S000964176 |
| <i>Mycobacterium</i> tuberculosis T gM-1 caprine AJ131120                               | S000014993 |
| <i>Mycobacterium</i> ulcerans X58954                                                    | S000008908 |
| <i>Mycobacterium</i> vanbaalenii T type strainDSM 7251PYR-1 X84977                      | S000334571 |
| <i>Mycoplasma</i> agalactiae T M24290                                                   | S000436112 |
| <i>Mycoplasma</i> arthritidis T M24580                                                  | S000436128 |
| <i>Mycoplasma</i> capricolum subsp capripneumoniae T F38 M94728                         | S000380940 |
| <i>Mycoplasma</i> genitalium T G37 X77334                                               | S000015364 |
| <i>Mycoplasma</i> hyopneumoniae ATCC27719 Y00149                                        | S000004349 |
| <i>Mycoplasma</i> mobile T M24480                                                       | S000436123 |
| <i>Mycoplasma</i> mycoides subsp mycoides LC 8756-13 AF085350                           | S000428670 |
| <i>Mycoplasma</i> pneumoniae T M29061                                                   | S000436172 |
| <i>Mycoplasma</i> pulmonis PG34T AF125582                                               | S000387266 |
| <i>Mycoplasma</i> synoviae WVU 1853 pMSk3-4 pMSF16S X52083                              | S000011604 |
| <i>Myxococcus</i> xanthus UCDAV1 AY724797                                               | S000424700 |
| <i>Natranaerobius</i> thermophilus JWNM-WN-LF DQ417202                                  | S000728348 |
| <i>Nautilia</i> profundicola AmH CP001279                                               | S001292489 |
| <i>Neisseria</i> gonorrhoeae T NCTC 83785 X07714                                        | S000003950 |
| <i>Neisseria</i> meningitidis N94II AJ239310                                            | S000003952 |
| <i>Neorickettsia</i> sennetsu T 11908 M73225                                            | S000010381 |
| <i>Nitrobacter</i> hamburgensis T X14 L11663                                            | S000414382 |
| <i>Nitrosococcus</i> oceani T M96395                                                    | S000021135 |
| <i>Nitrosomonas</i> europaea T M96399                                                   | S000016676 |
| <i>Nitrosomonas</i> eutropha T Nm57 AY123795                                            | S000396471 |
| <i>Nitrospira</i> multiformis T L35509                                                  | S000414634 |
| <i>Nocardia</i> farcinica T ATCC 3318 CIP 78274 X80595                                  | S000364351 |
| <i>Nocardioides</i> sp H-1 T AB087721                                                   | S000495764 |
| <i>Nostoc</i> punctiforme PCC 73102 T PCC73102 AF027655                                 | S000427839 |
| <i>Novosphingobium</i> aromaticivorans T SMCC F199 U20756                               | S000843930 |

|                                                                                     |            |
|-------------------------------------------------------------------------------------|------------|
| <i>Oceanobacillus iheyensis</i> HTE831 T AB010863                                   | S000541807 |
| <i>Ochrobactrum anthropi</i> T LMG 3301 U70978                                      | S000438370 |
| <i>Oenococcus oeni</i> T M35820                                                     | S000436257 |
| <i>Oligotropha carboxidovorans</i> S23 AB099659                                     | S000385783 |
| Onion yellows phytoplasma D12569                                                    | S000413451 |
| <i>Opitutus terrae</i> T PB90-1 AJ229235                                            | S000018839 |
| <i>Orientia tsutsugamushi</i> T Karp D38623                                         | S000413795 |
| <i>Parabacteroides distasonis</i> T M86695                                          | S000436850 |
| <i>Paracoccus denitrificans</i> T ATCC 17741T Y16927                                | S000013118 |
| <i>Parvibaculum lavamentivorans</i> T DS-1 AY387398                                 | S000461692 |
| <i>Pasteurella multocida</i> T M35018                                               | S000436253 |
| <i>Pectobacterium atrosepticum</i> 558 AF373179                                     | S000007553 |
| <i>Pediococcus pentosaceus</i> DSM 20336 T AJ305321                                 | S000013989 |
| <i>Pelobacter carbinolicus</i> T GraBd1 DSM 2380 X79413                             | S000008920 |
| <i>Pelobacter propionicus</i> T OttBd1 DSM2379 X70954                               | S000005137 |
| <i>Pelodictyon phaeum</i> CIB 2401 AJ291828                                         | S000001062 |
| <i>Pelotomaculum thermopropionicum</i> SI T AB035723                                | S000383099 |
| <i>Persephonella marina</i> T EX-H1 AF188332                                        | S000388827 |
| <i>Petrogona mobilis</i> T SJ95T Y15479                                             | S000015010 |
| <i>Phenylobacterium zucineum</i> HLK1 CP000747                                      | S001152240 |
| <i>Photorhabdus luminescens</i> subsp <i>laumondii</i> T TT01 AJ007404              | S000019290 |
| <i>Polaromonas naphthalenivorans</i> T CJ2 AY166684                                 | S000399364 |
| <i>Polynucleobacter necessarius</i> subsp <i>necessarius</i> T X93019               | S000245913 |
| <i>Porphyromonas gingivalis</i> T L16492                                            | S000414475 |
| <i>Prochlorococcus marinus</i> subsp <i>pastoris</i> T PCC 9511 ATCC700925 AF180967 | S000388727 |
| <i>Propionibacterium acnes</i> T DSM 1897 X53218                                    | S000129985 |
| <i>Prosthecochloris aestuarii</i> T SK 413 Y07837                                   | S000138443 |
| <i>Proteus mirabilis</i> T ATCC 29906T AF008582                                     | S000000179 |
| <i>Pseudoalteromonas atlantica</i> T IAM 12927T X82134                              | S000006832 |
| <i>Pseudoalteromonas haloplanktis</i> T ATCC 14393 X67024                           | S000127669 |
| <i>Pseudomonas aeruginosa</i> T DSM50071 X06684                                     | S000010427 |
| <i>Pseudomonas entomophila</i> L48 AY907566                                         | S000576961 |
| <i>Pseudomonas fluorescens</i> T DSM 50090T type strain Z76662                      | S000022197 |
| <i>Pseudomonas mendocina</i> T M59154                                               | S000436517 |
| <i>Pseudomonas putida</i> T IFO 14164 ATCC 12633 D37923                             | S000413774 |
| <i>Pseudomonas stutzeri</i> T CCUG 11256 U26262                                     | S000437391 |
| <i>Pseudomonas syringae</i> T ATCC 19310 D84026                                     | S000009688 |
| <i>Psychrobacter arcticus</i> 273-4 T AY444822                                      | S000502157 |
| <i>Psychrobacter cryohalolentis</i> K5 T AY660685                                   | S000594703 |
| <i>Psychromonas ingrahamii</i> 37 T U73721                                          | S000438408 |
| <i>Ralstonia solanacearum</i> T ATCC 11696 X67036                                   | S000000634 |
| <i>Renibacterium salmoninarum</i> T ATCC 33209 Leaburg X51601                       | S000129969 |
| <i>Rhizobium etli</i> T CFN 42 USDA 9032 U28916                                     | S000437446 |
| <i>Rhizobium radiobacter</i> K84 ATCC BAA-868 CP000628                              | S001292455 |
| <i>Rhizobium radiobacter</i> str C58 U Washington AE009324                          | S000497810 |
| <i>Rhizobium vitis</i> T LMG 8750 X67225                                            | S000364331 |
| <i>Rhodobacter sphaeroides</i> T 241 X53853                                         | S000364319 |
| <i>Rhodocista centenaria</i> SW SW ATCC 51521 CP000613                              | S001198298 |
| <i>Rhodococcus erythropolis</i> T ATCC 4277T X81929                                 | S000000256 |
| <i>Rhodococcus jostii</i> T IFO16295 AB046357                                       | S000015177 |

|                                                                                                |            |
|------------------------------------------------------------------------------------------------|------------|
| <i>Rhodococcus opacus</i> T type strain DSM43205 X80630                                        | S000364385 |
| <i>Rhodoferax ferrireducens</i> T T118 AF435948                                                | S000394152 |
| <i>Rhodopirellula baltica</i> SH 1 BX294149                                                    | S000528536 |
| <i>Rhodopseudomonas palustris</i> T ATCC 17001 D25312                                          | S000413604 |
| <i>Rhodospirillum rubrum</i> T ATCC 11170 D30778                                               | S000413733 |
| <i>Rickettsia akari</i> T MK Kaplan L36099                                                     | S000414651 |
| <i>Rickettsia bellii</i> T 369L42-1 L36103                                                     | S000414655 |
| <i>Rickettsia canadensis</i> T 2678 L36104                                                     | S000414656 |
| <i>Rickettsia conorii</i> Moroccan L36105                                                      | S000414657 |
| <i>Rickettsia felis</i> URRWXCa2 URRWXCa2 California 2 CP000053                                | S000581773 |
| <i>Rickettsia massiliae</i> T Mtu1 L36214                                                      | S000414664 |
| <i>Rickettsia prowazekii</i> M21789                                                            | S000436058 |
| <i>Rickettsia rickettsii</i> T L36217                                                          | S000414667 |
| <i>Rickettsia typhi</i> T Wilmington L36221                                                    | S000414671 |
| <i>Roseiflexus castenholzii</i> T HLO8 AB041226                                                | S000469300 |
| <i>Roseiflexus</i> sp RS-1 CP000686                                                            | S000870903 |
| <i>Roseobacter denitrificans</i> T OCH 114 M96746                                              | S000016668 |
| <i>Rubrobacter xylanophilus</i> T PRD-1 X87135                                                 | S000010067 |
| <i>Ruegeria pomeroyi</i> T DSS-3 AF098491                                                      | S000428852 |
| <i>Saccharophagus degradans</i> 2-40 T AF055269                                                | S000569987 |
| <i>Saccharopolyspora erythraea</i> T NRRL 2338 X53198                                          | S000126948 |
| <i>Salinibacter ruber</i> T M31 AF323500                                                       | S000391577 |
| <i>Salinispora tropica</i> CNB440 AY040617                                                     | S000531428 |
| <i>Salmonella enterica</i> subsp <i>enterica</i> T ATCC 13311 X80681                           | S000000641 |
| <i>Serratia proteamaculans</i> T DSM 4543 AJ233434                                             | S000012783 |
| <i>Shewanella amazonensis</i> T SB2B AF005248                                                  | S000386987 |
| <i>Shewanella baltica</i> T NCTC 10735 AJ000214                                                | S000022438 |
| <i>Shewanella denitrificans</i> T OS-217 AJ311964                                              | S000123243 |
| <i>Shewanella frigidimarina</i> T ACAM 591T ICP1 U85903                                        | S000438619 |
| <i>Shewanella halifaxensis</i> T HAW-EB4 AY579751                                              | S000379104 |
| <i>Shewanella loihica</i> T PV-4 ATCC BAA-1088 DQ286387                                        | S000646143 |
| <i>Shewanella oneidensis</i> DML7 AF387347                                                     | S000392860 |
| <i>Shewanella pealeana</i> T ANG-SQ1 AF011335                                                  | S000387087 |
| <i>Shewanella piezotolerans</i> WP3 type strain WP3 AJ551090                                   | S000351860 |
| <i>Shewanella putrefaciens</i> T ATCC 8071 X82133                                              | S000009307 |
| <i>Shewanella sediminis</i> T HAW-EB3 AY579750                                                 | S000573255 |
| <i>Shewanella woodyi</i> T MS32 AF003549                                                       | S000386899 |
| <i>Shigella boydii</i> X96965                                                                  | S000000828 |
| <i>Shigella dysenteriae</i> T X96966                                                           | S000000258 |
| <i>Shigella flexneri</i> T X96963                                                              | S000013935 |
| <i>Shigella sonnei</i> X80726                                                                  | S000003976 |
| <i>Sodalis glossinidius</i> AF548135                                                           | S000432756 |
| <i>Sorangium cellulosum</i> So9857 AF467674                                                    | S000001787 |
| <i>Sphingomonas wittichii</i> T DSM 6014 AB021492                                              | S000382574 |
| <i>Sphingopyxis alaskensis</i> S23 AY509242                                                    | S000262745 |
| <i>Staphylococcus aureus</i> subsp <i>aureus</i> T ATCC 12600 D83357                           | S000413958 |
| <i>Staphylococcus carnosus</i> subsp <i>carnosus</i> T ATCC 51365T AB009934                    | S000381981 |
| <i>Staphylococcus epidermidis</i> T ATCC 14990 D83363                                          | S000413964 |
| <i>Staphylococcus haemolyticus</i> T ATCC 29970 MAFF 911476 D83367                             | S000413968 |
| <i>Staphylococcus saprophyticus</i> subsp <i>saprophyticus</i> T ATCC 15305 MAFF 911473 D83371 | S001171519 |



|                                                                             |            |
|-----------------------------------------------------------------------------|------------|
| <i>Stenotrophomonas maltophilia</i> T ATCC 13637T AB008509                  | S000381870 |
| <i>Streptococcus agalactiae</i> GTC 730 T ATCC 51487 AB112407               | S000319535 |
| <i>Streptococcus equi</i> subsp <i>equi</i> NCDO 2493T X58314               | S000131147 |
| <i>Streptococcus gordonii</i> T ATCC 10558 AF003931                         | S000386903 |
| <i>Streptococcus mutans</i> T NCTC 10449T X58303                            | S000134021 |
| <i>Streptococcus pneumoniae</i> NCTC 7465T X58312                           | S000127578 |
| <i>Streptococcus pyogenes</i> T ATCC 12344 NCIB 11841 MAFF 910217 AB002521  | S000381689 |
| <i>Streptococcus sanguinis</i> T ATCC 10556 AF003928                        | S000386900 |
| <i>Streptococcus suis</i> T ATCC 43765 NCTC 10234 AB002525                  | S000381693 |
| <i>Streptococcus thermophilus</i> T DSM 20617 X68418                        | S000004394 |
| <i>Streptococcus uberis</i> T ATCC 19436 NCTC 3858 AB002526                 | S000381694 |
| <i>Streptomyces avermitilis</i> T MA-4680 AB078897                          | S000469461 |
| <i>Streptomyces coelicolor</i> T DSM 40233T Z76678                          | S000011639 |
| <i>Streptomyces griseus</i> T JCM 4623 AB045872                             | S000011833 |
| <i>Sulfurihydrogenibium azorense</i> Az-Fu1 T Az-Fu1 Fc8A70 AF528192        | S000431601 |
| <i>Sulfurihydrogenibium</i> sp 153IV-9 AM259491                             | S000728033 |
| <i>Sulfurimonas denitrificans</i> T DSM 1251 L40808                         | S000435956 |
| <i>Symbiobacterium thermophilum</i> T AB004913                              | S000009012 |
| <i>Synechocystis</i> sp MMG-7 FJ839358                                      | S001352300 |
| <i>Syntrophobacter fumaroxidans</i> T MPOB X82874                           | S000022640 |
| <i>Syntrophomonas wolfei</i> subsp <i>wolfei</i> LYB AF022248               | S000387176 |
| <i>Thermoanaerobacter pseudethanolicus</i> ATCC 33223 ATCC 33223 39E L09164 | S000414342 |
| <i>Thermoanaerobacter</i> sp TLO AY328919                                   | S000327637 |
| <i>Thermobifida fusca</i> T ATCC 27730 AF002264                             | S000386888 |
| <i>Thermomicrobium roseum</i> T M34115                                      | S000436216 |
| <i>Thermosiphon africanus</i> T M83140                                      | S000010674 |
| <i>Thermosiphon melanesiensis</i> T BI429 Z70248                            | S000017523 |
| <i>Thermosynechococcus elongatus</i> BP-1 BA000039                          | S000528501 |
| <i>Thermotoga lettingae</i> T TMO AF355615                                  | S000392200 |
| <i>Thermotoga maritima</i> T M21774                                         | S000436057 |
| <i>Thermotoga neapolitana</i> T DSM 4359 AB039768                           | S000383207 |
| <i>Thermotoga petrophila</i> T RKU-1 AB027016                               | S000010700 |
| <i>Thermotoga</i> sp KOL6 AJ401018                                          | S000433497 |
| <i>Thermus thermophilus</i> T M26923                                        | S000436153 |
| <i>Thiobacillus denitrificans</i> T NCIMB 9548 AJ243144                     | S000016476 |
| <i>Treponema denticola</i> T ATCC35404 AF139204                             | S000387944 |
| <i>Treponema pallidum</i> subsp <i>pertenue</i> Gauthier AF426102           | S000003270 |
| <i>Trichodesmium erythraeum</i> AF013030                                    | S000427667 |
| <i>Tropheryma whipplei</i> T twist AF251035                                 | S000390102 |
| <i>Ureaplasma parvum</i> serovar 3 T ATCC27815 AF073456                     | S000439927 |
| <i>Ureaplasma urealyticum</i> T M23935                                      | S000436101 |
| <i>Verminephrobacter eiseniae</i> EF05-1 DQ327668                           | S000638914 |
| <i>Vibrio cholerae</i> T ATCC 14035T X74695                                 | S000002810 |
| <i>Vibrio harveyi</i> T ATCC 14126T X74706                                  | S000008971 |
| <i>Vibrio parahaemolyticus</i> T ATCC 17802T X74720                         | S000013957 |
| <i>Vibrio splendidus</i> T ATCC 33125T X74724                               | S000007850 |
| <i>Vibrio vulnificus</i> T ATCC 27562T X74726                               | S000013154 |
| <i>Wolbachia</i> endosymbiont of <i>Onchocerca gutturosa</i> AJ276498       | S000000013 |
| <i>Wolbachia</i> sp L02888                                                  | S000001444 |
| <i>Wolinella succinogenes</i> T ATCC 29543 M88159                           | S000363191 |

|                                                                     |            |
|---------------------------------------------------------------------|------------|
| <i>Xanthobacter autotrophicus</i> T 7c X94201                       | S000752412 |
| <i>Xanthomonas axonopodis</i> T LMG 538-T X95919                    | S000381396 |
| <i>Xanthomonas campestris</i> T LMG 739 T Y10754                    | S000015789 |
| <i>Xanthomonas oryzae</i> T LMG 5047-T X95921                       | S000381398 |
| <i>Yersinia enterocolitica</i> subsp <i>enterocolitica</i> T M59292 | S000436530 |
| <i>Yersinia pestis</i> T NCTC 5923 AF366383                         | S000392506 |
| <i>Yersinia pseudotuberculosis</i> T ATCC 29833 AF366375            | S000392498 |
| <i>Zymomonas mobilis</i> subsp <i>mobilis</i> T ATCC10988 AF281031  | S000003443 |

**Archaea (50 organisms)**

|                                                           | <b>RDP id</b> |
|-----------------------------------------------------------|---------------|
| <i>Aeropyrum pernix</i> T K1 AB008745                     | S000529500    |
| <i>Archaeoglobus fulgidus</i> L3 DQ131905                 | S000599559    |
| <i>Caldivirga maquilingensis</i> T IC-167 AB013926        | S000469187    |
| <i>Candidatus Korarchaeum cryptofilum</i> OPF8 CP000968   | S001014502    |
| <i>Candidatus Methanoregula boonei</i> 6A8 DQ282124       | S000646142    |
| <i>Haloarcula marismortui</i> pHC8 X61688                 | S000381229    |
| <i>Halobacterium salinarum</i> T DSM 3754 AJ496185        | S000530878    |
| <i>Halobacterium</i> sp NCIMB 741 AB074565                | S000384602    |
| <i>Haloquadratum walsbyi</i> C23 AY676200                 | S000422110    |
| <i>Halorubrum lacusprofundi</i> T ACAM 34 X82170          | S000414757    |
| <i>Hyperthermus butylicus</i> T DSM 5456 X99553           | S000381421    |
| <i>Ignicoccus hospitalis</i> KIN4/I CP000816              | S000925961    |
| <i>Metallosphaera sedula</i> T DSM 5348 X90481            | S000414765    |
| <i>Methanobrevibacter smithii</i> T PS U55233             | S000437792    |
| <i>Methanocaldococcus jannaschii</i> M59126               | S000436489    |
| <i>Methanococcoides burtonii</i> T DSM 6242 X65537        | S000414735    |
| <i>Methanococcus aeolicus</i> U39016                      | S000437548    |
| <i>Methanococcus maripaludis</i> T JJ U38484              | S000437542    |
| <i>Methanococcus vannielii</i> T SB AY196675              | S000401565    |
| <i>Methanocorpusculum labreanum</i> T Z AF095267          | S000428808    |
| <i>Methanoculleus marisnigri</i> T M59134                 | S000436497    |
| <i>Methanopyrus kandleri</i> T av19 M59932                | S000650511    |
| <i>Methanosaeta thermophila</i> PT T AB071701             | S000384494    |
| <i>Methanosarcina acetivorans</i> T M59137                | S000436500    |
| <i>Methanosarcina barkeri</i> T DSM 800 T OCM 38 AJ012094 | S000432905    |
| <i>Methanosarcina mazei</i> DSM 2053T OCM 26 AJ012095     | S000432906    |
| <i>Methanosphaera stadtmanae</i> T M59139                 | S000436502    |
| <i>Methanosphaerula palustris</i> E1-9c EU156000          | S000943039    |
| <i>Methanothermobacter thermautotrophicus</i> T X68712    | S000414737    |
| <i>Nanoarchaeum equitans</i> Kin4-M AJ318041              | S000433441    |
| <i>Natronomonas pharaonis</i> JCM8858 D87971              | S000380812    |
| <i>Nitrosopumilus maritimus</i> SCM1 CP000866             | S000965223    |
| <i>Picrophilus oshimae</i> T KAW2/2 X84901                | S000414758    |
| <i>Pyrobaculum aerophilum</i> T im2 L07510                | S000414322    |
| <i>Pyrobaculum arsenaticum</i> T PZ6 AJ277124             | S000433096    |
| <i>Pyrobaculum calidifontis</i> VA1 AB078332              | S000384778    |
| <i>Pyrobaculum islandicum</i> T geo3 L07511               | S000414323    |
| <i>Pyrococcus abyssi</i> GE23 AY099166                    | S000395987    |
| <i>Pyrococcus furiosus</i> T U20163                       | S000437256    |
| <i>Pyrococcus horikoshii</i> T JA-1 D87344                | S000582036    |

|                                                         |            |
|---------------------------------------------------------|------------|
| Staphylothermus marinus T F1 - DSM 3639 X99560          | S000381428 |
| Sulfolobus islandicus I2 AY247893                       | S000404559 |
| Sulfolobus solfataricus T DSM 1616 X90478               | S000414762 |
| Sulfolobus tokodaii T strain 7 AB022438                 | S000382597 |
| Thermococcus kodakarensis KOD1 AP006878                 | S000544863 |
| Thermococcus onnurineus NA1 DQ167232                    | S000600392 |
| Thermofilum pendens T Hvv3 DSM 2475 X14835              | S000529303 |
| Thermoplasma volcanium T GSS1 AJ299215                  | S000433278 |
| Thermoproteus neutrophilus T JCM9278 AB009618           | S000469148 |
| Uncultured methanogenic archaeon SMPFLSS56m 11 FJ982758 | S001449158 |
